# Supplementary material for: Factors influencing diagnosis and treatment initiation for multidrug-resistant/rifampicin-resistant tuberculosis in six sub-Saharan African countries: a mixed-methods systematic review
Source: PubMed Central journal article supplement — BMJ Glob Health. 2020 Jul 2;5(7):e002280. doi: 10.1136/bmjgh-2019-002280 (PMC7333807; doi:10.1136/bmjgh-2019-002280), 2020-07-02
Supplement: bmjgh-2019-002280supp001.pdf [file bmjgh-2019-002280supp001.pdf]

**Annex 1: PICO Elements**

| <b>PICO Aspect</b> | <b>Description</b>                                                      | <b>Key Terms</b>                                                                                                                                                                                                                                                                                                                                                                                                                                                                                                                                                                                                                                                                                                                                   |
|--------------------|-------------------------------------------------------------------------|----------------------------------------------------------------------------------------------------------------------------------------------------------------------------------------------------------------------------------------------------------------------------------------------------------------------------------------------------------------------------------------------------------------------------------------------------------------------------------------------------------------------------------------------------------------------------------------------------------------------------------------------------------------------------------------------------------------------------------------------------|
| Population         | Individuals eligible for drug-resistant TB testing and treatment        | (multi-drug resistant tuberculosis or drug resistant tuberculosis or tuberculosis or pulmonary tuberculosis or Mycobacterium tuberculosis or MDR or MDRTB or DRTB or DR-TB)                                                                                                                                                                                                                                                                                                                                                                                                                                                                                                                                                                        |
| Intervention       | Any studies on the factors influencing diagnosis or treatment for DR-TB | (Health seeking or care-seeking or health care delivery or case detection or case finding or diagnosis or treatment initiation or patient cost* or transport cost* or socio-demograph* or socio-economic* or place of residence or rural or distance or age or sex or knowledge or perception or gender or presentation)                                                                                                                                                                                                                                                                                                                                                                                                                           |
| Comparator         | Not applicable or as defined in the included studies, where applicable  |                                                                                                                                                                                                                                                                                                                                                                                                                                                                                                                                                                                                                                                                                                                                                    |
| Outcome            | Delay or missed opportunities in diagnosis and or treatment for DR-TB.  | (provider barriers or patient barriers or health system barriers or missed diagnosis or untreated or diagnostic delay or late diagnosis or delay in diagnosis or access to diagnosis or diagnostic errors or undiagnosed or case diagnosis or early diagnosis or late presentation)                                                                                                                                                                                                                                                                                                                                                                                                                                                                |
| Setting            | Sub-Saharan African countries                                           | (Africa or SSA or sub-saharan Africa or Algeria or Angola or Benin or Botswana or Burkina Faso or Burundi or Cabo Verde or Cameroon or Central African Republic or Chad or Comoros or Democratic Republic of the Congo or Republic of the Congo or Cote d'Ivoire or Djibouti or Egypt or Equatorial Guinea or Eritrea or Ethiopia or Gabon or Gambia or Ghana or Guinea or Guinea-Bissau or Kenya or Lesotho or Liberia or Libya or Madagascar or Malawi or Mali or Mauritania or Mauritius or Morocco or Mozambique or Namibia or Niger or Nigeria or Rwanda or Sao Tome or Senegal or Seychelles or Sierra Leone or Somalia or South Africa or South Sudan or Sudan or Swaziland or Tanzania or Togo or Tunisia or Uganda or Zambia or Zimbabwe) |
| Study design       | Original, primary quantitative, qualitative and mixed studies           |                                                                                                                                                                                                                                                                                                                                                                                                                                                                                                                                                                                                                                                                                                                                                    |
| Time period        | Between January 2006 and July 2019                                      |                                                                                                                                                                                                                                                                                                                                                                                                                                                                                                                                                                                                                                                                                                                                                    |

## Annex 2: Quality Assessment Results

| References                  | Item |   |   |   |   |   |   |   |   |    |    |    |    |    |    |    |    |    |    |    |    |    |    |    |    |    |    |    |    |    |    |    | T |    |   |
|-----------------------------|------|---|---|---|---|---|---|---|---|----|----|----|----|----|----|----|----|----|----|----|----|----|----|----|----|----|----|----|----|----|----|----|---|----|---|
|                             | 1    | 2 | 3 | 4 | 5 | 6 | 7 | 8 | 9 | 10 | 11 | 12 | 13 | 14 | 15 | 16 | 17 | 18 | 19 | 20 | 21 | 22 | 23 | 24 | 25 | 26 | 27 | 28 | 29 | 30 | 31 | 32 |   |    |   |
| <b>Qualitative Studies</b>  |      |   |   |   |   |   |   |   |   |    |    |    |    |    |    |    |    |    |    |    |    |    |    |    |    |    |    |    |    |    |    |    |   |    |   |
| 1. Bieh 2017                | 1    | 0 | 0 | 1 | 0 | 1 | 1 | 1 | 0 | 1  | 1  | 1  | 1  | 1  | 0  | 0  | 1  | 0  | 1  | 0  | 1  | 0  | 0  | 1  | 0  | 1  | 1  | 0  | 1  | 1  | 1  | 1  | 1 | 20 | B |
| 2. Naidoo 2015              | 1    | 0 | 1 | 1 | 0 | 1 | 1 | 1 | 0 | 1  | 1  | 1  | 1  | 1  | 0  | 1  | 1  | 1  | 1  | 0  | 0  | 1  | 0  | 1  | 1  | 1  | 0  | 0  | 1  | 1  | 1  | 1  | 1 | 23 | A |
| <b>Quantitative Studies</b> |      |   |   |   |   |   |   |   |   |    |    |    |    |    |    |    |    |    |    |    |    |    |    |    |    |    |    |    |    |    |    |    |   |    |   |
| 3. Cox 2015                 | 1    | 1 | 1 | 1 | 1 | 1 | 1 | 1 | 1 | 0  | 1  | 1  | 1  | 0  | 1  | 0  | 0  | 0  | 0  | 0  | 1  | 0  | 0  | 1  | 1  | 0  | 1  | 1  | 1  | 1  | 1  | 19 | B |    |   |
| 4. Cox 2017                 | 1    | 1 | 1 | 1 | 1 | 1 | 1 | 1 | 1 | 1  | 1  | 1  | 1  | 0  | 0  | 1  | 0  | 1  | 1  | 1  | 1  | 1  | 1  | 1  | 1  | 1  | 0  | 1  | 1  | 1  | 26 | A  |   |    |   |
| 5. Dlamini-Mvelase 2014     | 1    | 1 | 1 | 1 | 1 | 1 | 1 | 1 | 1 | 0  | 1  | 1  | 1  | 0  | 1  | 1  | 0  | 1  | 1  | 1  | 0  | 0  | 1  | 1  | 1  | 1  | 1  | 1  | 1  | 1  | 0  | 24 | A |    |   |
| 6. Ebonwu 2013              | 1    | 1 | 1 | 1 | 1 | 1 | 1 | 1 | 1 | 0  | 0  | 1  | 1  | 0  | 0  | 0  | 0  | 1  | 1  | 1  | 1  | 0  | 0  | 1  | 1  | 1  | 1  | 1  | 1  | 1  | 1  | 22 | A |    |   |
| 7. Evans 2018               | 0    | 1 | 1 | 1 | 1 | 1 | 1 | 1 | 1 | 0  | 1  | 1  | 1  | 1  | 0  | 1  | 0  | 1  | 1  | 1  | 1  | 0  | 1  | 1  | 1  | 1  | 1  | 1  | 1  | 1  | 1  | 25 | A |    |   |
| 8. Hanrahan 2012            | 1    | 1 | 1 | 1 | 1 | 1 | 1 | 1 | 1 | 0  | 1  | 1  | 1  | 1  | 0  | 0  | 0  | 1  | 1  | 1  | 1  | 0  | 1  | 1  | 1  | 1  | 1  | 1  | 1  | 1  | 1  | 24 | A |    |   |
| 9. Hanrahan 2013            | 0    | 1 | 1 | 1 | 1 | 1 | 1 | 1 | 1 | 0  | 1  | 1  | 1  | 0  | 0  | 1  | 0  | 1  | 1  | 1  | 1  | 0  | 1  | 1  | 1  | 1  | 1  | 1  | 1  | 1  | 1  | 24 | A |    |   |
| 10. Iruedo 2017             | 1    | 1 | 1 | 1 | 1 | 1 | 1 | 1 | 1 | 1  | 1  | 1  | 1  | 0  | 1  | 1  | 0  | 1  | 1  | 0  | 1  | 0  | 1  | 1  | 1  | 1  | 1  | 1  | 1  | 1  | 1  | 26 | A |    |   |
| 11. Jacobson 2012           | 1    | 1 | 1 | 1 | 1 | 1 | 1 | 0 | 1 | 0  | 1  | 1  | 1  | 0  | 1  | 1  | 0  | 1  | 1  | 0  | 1  | 0  | 1  | 1  | 1  | 1  | 1  | 0  | 0  | 1  | 22 | A  |   |    |   |
| 12. Jacobson 2017           | 1    | 1 | 1 | 1 | 1 | 1 | 1 | 1 | 1 | 0  | 1  | 1  | 1  | 0  | 1  | 0  | 0  | 1  | 1  | 1  | 1  | 1  | 1  | 1  | 1  | 1  | 1  | 1  | 1  | 1  | 26 | A  |   |    |   |
| 13. Jokwiro 2018            | 1    | 1 | 1 | 1 | 1 | 1 | 1 | 1 | 1 | 0  | 1  | 1  | 1  | 1  | 0  | 1  | 0  | 1  | 0  | 0  | 0  | 0  | 0  | 1  | 1  | 1  | 1  | 1  | 1  | 1  | 22 | A  |   |    |   |
| 14. Kweza 2018              | 0    | 1 | 1 | 1 | 1 | 1 | 1 | 1 | 1 | 1  | 1  | 1  | 1  | 1  | 1  | 1  | 1  | 1  | 1  | 1  | 1  | 0  | 1  | 1  | 1  | 1  | 1  | 1  | 1  | 0  | 27 | A  |   |    |   |
| 15. McLaren 2017            | 1    | 1 | 1 | 1 | 1 | 1 | 1 | 1 | 1 | 0  | 1  | 1  | 1  | 0  | 0  | 0  | 0  | 1  | 0  | 0  | 0  | 0  | 0  | 0  | 0  | 0  | 1  | 1  | 1  | 1  | 1  | 18 | B |    |   |
| 16. Metcalfe                | 0    | 1 | 1 | 1 | 1 | 1 | 1 | 1 | 1 | 0  | 1  | 1  | 1  | 1  | 0  | 0  | 0  | 1  | 1  | 1  | 1  | 1  | 0  | 1  | 1  | 1  | 1  | 1  | 1  | 1  | 24 | A  |   |    |   |
| 17. Mohr 2017               | 1    | 1 | 1 | 1 | 1 | 1 | 1 | 1 | 1 | 0  | 1  | 1  | 1  | 0  | 0  | 1  | 0  | 1  | 1  | 1  | 1  | 0  | 1  | 1  | 1  | 1  | 1  | 1  | 1  | 0  | 24 | A  |   |    |   |
| 18. Moyo                    | 0    | 1 | 1 | 1 | 1 | 1 | 1 | 1 | 1 | 0  | 1  | 1  | 1  | 1  | 0  | 1  | 0  | 1  | 0  | 0  | 1  | 0  | 1  | 1  | 1  | 1  | 1  | 1  | 1  | 1  | 22 | A  |   |    |   |
| 19. Naidoo 2014             | 1    | 1 | 1 | 1 | 1 | 1 | 1 | 1 | 1 | 0  | 1  | 1  | 1  | 0  | 0  | 0  | 0  | 1  | 1  | 1  | 1  | 0  | 1  | 1  | 0  | 1  | 1  | 1  | 1  | 1  | 23 | A  |   |    |   |
| 20. Nkosi 2013              | 1    | 1 | 1 | 1 | 1 | 1 | 1 | 1 | 1 | 0  | 1  | 1  | 1  | 0  | 0  | 0  | 0  | 1  | 1  | 0  | 0  | 1  | 1  | 1  | 1  | 1  | 1  | 1  | 1  | 0  | 21 | A  |   |    |   |
| 21. Oga-Omenka 2019         | 1    | 1 | 1 | 1 | 1 | 1 | 1 | 1 | 1 | 0  | 1  | 1  | 1  | 1  | 1  | 0  | 1  | 0  | 1  | 1  | 1  | 1  | 1  | 1  | 1  | 1  | 1  | 1  | 1  | 1  | 26 | A  |   |    |   |
| 22. Oliwa 2018              | 1    | 1 | 1 | 1 | 1 | 1 | 1 | 1 | 1 | 0  | 1  | 1  | 1  | 1  | 0  | 0  | 0  | 1  | 0  | 0  | 1  | 1  | 0  | 1  | 1  | 1  | 1  | 1  | 1  | 0  | 22 | A  |   |    |   |
| 23. Timire 2019             | 1    | 1 | 1 | 1 | 1 | 1 | 1 | 1 | 1 | 0  | 1  | 1  | 1  | 1  | 0  | 0  | 0  | 1  | 0  | 1  | 1  | 0  | 1  | 1  | 1  | 1  | 1  | 1  | 1  | 1  | 24 | A  |   |    |   |
| 24 Van Den Handel 2015      | 1    | 1 | 1 | 1 | 1 | 1 | 1 | 1 | 1 | 0  | 1  | 1  | 1  | 1  | 0  | 1  | 0  | 0  | 1  | 0  | 0  | 1  | 0  | 0  | 1  | 1  | 1  | 1  | 1  | 1  | 23 | A  |   |    |   |

| References                   | Item |   |   |   |   |   |   |   |   |    |    |    |    |    |    |    |    |    |    |    |    |    |    |    |    |    |    |    |    |    |    |    | T |  |  |    |   |  |  |  |  |  |  |  |  |  |  |  |  |  |  |
|------------------------------|------|---|---|---|---|---|---|---|---|----|----|----|----|----|----|----|----|----|----|----|----|----|----|----|----|----|----|----|----|----|----|----|---|--|--|----|---|--|--|--|--|--|--|--|--|--|--|--|--|--|--|
|                              | 1    | 2 | 3 | 4 | 5 | 6 | 7 | 8 | 9 | 10 | 11 | 12 | 13 | 14 | 15 | 16 | 17 | 18 | 19 | 20 | 21 | 22 | 23 | 24 | 25 | 26 | 27 | 28 | 29 | 30 | 31 | 32 |   |  |  |    |   |  |  |  |  |  |  |  |  |  |  |  |  |  |  |
| <b>Mixed Methods Studies</b> |      |   |   |   |   |   |   |   |   |    |    |    |    |    |    |    |    |    |    |    |    |    |    |    |    |    |    |    |    |    |    |    |   |  |  |    |   |  |  |  |  |  |  |  |  |  |  |  |  |  |  |
| 25. Doulla 2019              | 1    | 1 | 1 | 1 | 1 | 1 | 1 | 1 | 1 | 1  | 0  | 1  | 1  | 1  | 1  | 0  | 1  |    |    |    |    |    |    |    |    |    |    |    |    |    |    |    |   |  |  | 15 | A |  |  |  |  |  |  |  |  |  |  |  |  |  |  |
| 26. Mpagama 2019             | 0    | 1 | 0 | 1 | 1 | 0 | 0 | 1 | 1 | 1  | 0  | 1  | 1  | 1  | 1  | 0  | 1  |    |    |    |    |    |    |    |    |    |    |    |    |    |    |    |   |  |  | 11 | B |  |  |  |  |  |  |  |  |  |  |  |  |  |  |
| 27. Mnyambwa 2018            | 1    | 1 | 1 | 1 | 1 | 1 | 1 | 1 | 1 | 1  | 0  | 0  | 1  | 1  | 1  | 0  | 0  |    |    |    |    |    |    |    |    |    |    |    |    |    |    |    |   |  |  | 13 | A |  |  |  |  |  |  |  |  |  |  |  |  |  |  |
| 28. Weshuizen 2017           | 1    | 1 | 1 | 1 | 1 | 0 | 1 | 1 | 0 | 1  | 0  | 1  | 1  | 1  | 1  | 0  | 1  |    |    |    |    |    |    |    |    |    |    |    |    |    |    |    |   |  |  | 13 | A |  |  |  |  |  |  |  |  |  |  |  |  |  |  |
| 29. Zimri                    | 1    | 1 | 1 | 1 | 1 | 1 | 1 | 1 | 1 | 1  | 1  | 0  | 1  | 1  | 1  | 1  | 0  |    |    |    |    |    |    |    |    |    |    |    |    |    |    |    |   |  |  | 15 | A |  |  |  |  |  |  |  |  |  |  |  |  |  |  |

|       |                    |
|-------|--------------------|
| Grade | 0=Unclear; 1=Clear |
|-------|--------------------|

## Annex 3: Weighted Ranking of Access Factors

| BARRIERS                                            |         |       |                               |                |            |                                                           |
|-----------------------------------------------------|---------|-------|-------------------------------|----------------|------------|-----------------------------------------------------------|
| Factor                                              | Study # | Score | Number of studies with factor | Average scores | Final Rank | Comment if result not obvious or mixed methods            |
| Provider factors                                    |         |       |                               |                |            |                                                           |
| Guidelines non-availability                         | 21      | 3     | 2                             | 3.0            | 6          | Stated in results and table 2                             |
|                                                     | 1       | 3     |                               |                |            |                                                           |
| Infrastructure and equipment: coverage and coverage | 23      | 3     | 5                             | 3.0            | 15         |                                                           |
|                                                     | 27      | 3     |                               |                |            |                                                           |
|                                                     | 26      | 3     |                               |                |            |                                                           |
|                                                     | 27      | 3     |                               |                |            | Mentioned separately in qualitative part of mixed methods |
|                                                     | 2       | 3     |                               |                |            |                                                           |
| Decentralization                                    | 20      | 3     | 2                             | 2.5            | 5          |                                                           |
|                                                     | 26      | 2     |                               |                |            |                                                           |
| Laboratory operational issues                       | 13      | 3     | 9                             | 2.4            | 22         |                                                           |
|                                                     | 24      | 3     |                               |                |            |                                                           |
|                                                     | 26      | 3     |                               |                |            |                                                           |
|                                                     | 27      | 1     |                               |                |            | 25% and 18% affected by this barrier                      |
|                                                     | 28      | 3     |                               |                |            |                                                           |
|                                                     | 29      | 2     |                               |                |            | Reasons for this delay not given                          |
|                                                     | 3       | 3     |                               |                |            |                                                           |
|                                                     | 26      | 3     |                               |                |            |                                                           |
|                                                     | 27      | 1     |                               |                |            | Mentioned separately in qualitative part of mixed methods |
|                                                     |         |       |                               |                |            |                                                           |
| Clinic operational issues: waiting times            | 3       | 3     | 2                             | 2.5            | 5          |                                                           |
|                                                     | 29      | 2     |                               |                |            |                                                           |

| Factor                                                        | Study # | Score | Number of studies with factor | Average scores | Final Rank | Comment if result not obvious or mixed methods |
|---------------------------------------------------------------|---------|-------|-------------------------------|----------------|------------|------------------------------------------------|
| Provider factors                                              |         |       |                               |                |            |                                                |
| Clinic operational issues: patient tracking and follow up     | 21      | 3     | 3                             | 2.7            | 8          | Odds ratio in Table 3 and mentioned in results |
|                                                               | 3       | 3     |                               |                |            |                                                |
|                                                               | 27      | 2     |                               |                |            |                                                |
| Level of care- higher level                                   | 7       | 3     | 2                             | 2.0            | 4          | Odds ratio in Table 3 and mentioned in results |
|                                                               | 23      | 1     |                               |                |            |                                                |
| Private sector care: low index of suspicion, poor linkage     | 23      | 3     | 3                             | 3.0            | 9          |                                                |
|                                                               | 29      | 3     |                               |                |            |                                                |
|                                                               | 3       | 3     |                               |                |            |                                                |
| Rural location: differences in testing, capacity and referral | 13      | 3     | 5                             | 2.4            | 12         |                                                |
|                                                               | 16      | 2     |                               |                |            |                                                |
|                                                               | 24      | 2     |                               |                |            |                                                |
|                                                               | 27      | 3     |                               |                |            |                                                |
|                                                               | 26      | 2     |                               |                |            |                                                |
| Inadequate staff strength                                     | 2       | 3     | 3                             | 2.3            | 7          |                                                |
|                                                               | 26      | 3     |                               |                |            |                                                |
|                                                               | 27      | 1     |                               |                |            |                                                |
| Non-adherence to care guidelines                              | 5       | 3     | 7                             | 2.4            | 17.0       |                                                |
|                                                               | 13      | 2     |                               |                |            |                                                |
|                                                               | 18      | 3     |                               |                |            |                                                |
|                                                               | 21      | 3     |                               |                |            |                                                |
|                                                               | 23      | 2     |                               |                |            |                                                |
|                                                               | 24      | 2     |                               |                |            |                                                |
|                                                               | 3       | 2     |                               |                |            |                                                |
| Inadequate HCW knowledge, training and experience             | 6       | 2     | 7                             | 2.4            | 17.0       |                                                |
|                                                               | 27      | 3     |                               |                |            |                                                |
|                                                               | 29      | 3     |                               |                |            |                                                |
|                                                               | 1       | 2     |                               |                |            |                                                |
|                                                               | 3       | 2     |                               |                |            |                                                |
|                                                               | 26      | 3     |                               |                |            |                                                |
|                                                               | 30      | 2     |                               |                |            |                                                |

| Factor                                                                    | Study # | Score | Number of studies with factor | Average scores | Final Rank | Comment if result not obvious or mixed methods |
|---------------------------------------------------------------------------|---------|-------|-------------------------------|----------------|------------|------------------------------------------------|
| Provider factors                                                          |         |       |                               |                |            |                                                |
| Poor HCW attitude, motivation including stigma and discrimination         | 2       | 3     | 2                             | 2.5            | 5          |                                                |
|                                                                           | 27      | 2     |                               |                |            |                                                |
| Poor data management                                                      | 18      | 2     | 5                             | 2.2            | 11         |                                                |
|                                                                           | 22      | 2     |                               |                |            |                                                |
|                                                                           | 28      | 3     |                               |                |            |                                                |
|                                                                           | 26      | 3     |                               |                |            |                                                |
|                                                                           | 27      | 1     |                               |                |            |                                                |
| Older diagnostics and timeliness                                          | 10      | 3     | 3                             | 3.0            | 9          |                                                |
|                                                                           | 20      | 3     |                               |                |            |                                                |
|                                                                           | 26      | 3     |                               |                |            |                                                |
| Inadequate impact of newer diagnostics on rates of diagnosis or treatment | 4       | 2     | 4                             | 2.8            | 11         | Table 2 and discussion                         |
|                                                                           | 25      | 3     |                               |                |            |                                                |
|                                                                           | 5       | 3     |                               |                |            |                                                |
|                                                                           | 20      | 3     |                               |                |            |                                                |
| Inadequate availability to testing or testing materials                   | 29      | 2     | 2                             | 2.5            | 5          |                                                |
|                                                                           | 27      | 3     |                               |                |            |                                                |
| Inadequate access to second line drugs                                    | 1       | 3     | 1                             | 3              | 3          |                                                |
| Initial negative or invalid tests                                         | 3       | 3     | 1                             | 3              | 3          |                                                |
| Inadequate availability to testing or testing materials                   | 1       | 2     | 2                             | 2.5            | 5          |                                                |
|                                                                           | 29      | 3     |                               |                |            |                                                |
| Patient factors                                                           |         |       |                               |                |            |                                                |
| Female gender*                                                            | 15      | 3     | 4                             | 2.5            | 10         |                                                |
|                                                                           | 11      | 2     |                               |                |            |                                                |
|                                                                           | 13      | 2     |                               |                |            |                                                |
|                                                                           | 30      | 3     |                               |                |            |                                                |
| Younger patient age*                                                      | 5       | 2     | 3                             | 2.3            | 7          |                                                |
|                                                                           | 13      | 2     |                               |                |            |                                                |
|                                                                           | 23      | 3     |                               |                |            |                                                |
| Pregnancy                                                                 | 3       | 3     | 1                             | 3              | 3          |                                                |
| HIV negative status or fear of HIV diagnosis*                             | 10      | 3     | 3                             | 3.0            | 9          |                                                |
|                                                                           | 3       | 3     |                               |                |            |                                                |
|                                                                           | 23      | 3     |                               |                |            |                                                |
| Fewer presenting symptoms**                                               | 13      | 3     | 2                             | 3              | 6          |                                                |
|                                                                           | 15      | 3     |                               |                |            |                                                |

| Factor                                               | Study # | Score | Number of studies with factor | Average scores | Final Rank | Comment if result not obvious or mixed methods |
|------------------------------------------------------|---------|-------|-------------------------------|----------------|------------|------------------------------------------------|
| Patient factors                                      |         |       |                               |                |            |                                                |
| Lifestyle: cigarette smoking                         | 30      | 3     | 1                             | 3              | 3          |                                                |
| Ethnicity                                            | 30      | 3     | 1                             | 3              | 3          |                                                |
| Negative patient perception                          | 30      | 3     | 3                             | 3.0            | 9          |                                                |
|                                                      | 3       | 3     |                               |                |            |                                                |
|                                                      | 28      | 3     |                               |                |            |                                                |
| Self denial and non-disclosure                       | 2       | 3     | 2                             | 3              | 6          |                                                |
|                                                      | 3       | 3     |                               |                |            |                                                |
| Family, school or work commitments                   | 29      | 2     | 4                             | 2.3            | 9          |                                                |
|                                                      | 3       | 3     |                               |                |            |                                                |
|                                                      | 29      | 2     |                               |                |            |                                                |
|                                                      | 30      | 2     |                               |                |            |                                                |
| Loss to follow-up or death                           | 7       | 3     | 5                             | 2.6            | 13         |                                                |
|                                                      | 21      | 3     |                               |                |            |                                                |
|                                                      | 28      | 2     |                               |                |            |                                                |
|                                                      | 19      | 2     |                               |                |            |                                                |
|                                                      | 28      | 3     |                               |                |            |                                                |
| Less urban or informal residence and certain regions | 7       | 3     | 3                             | 2.7            | 8          |                                                |
|                                                      | 12      | 3     |                               |                |            |                                                |
|                                                      | 22      | 2     |                               |                |            |                                                |
| Transportation difficulty                            | 30      | 3     | 3                             | 2.3            | 7          |                                                |
|                                                      | 3       | 2     |                               |                |            |                                                |
|                                                      | 29      | 2     |                               |                |            |                                                |
| High costs of care                                   | 1       | 2     | 2                             | 2              | 4          |                                                |
|                                                      | 29      | 2     |                               |                |            |                                                |
| Treatment refusal                                    | 19      | 2     | 1                             | 2              | 2          |                                                |
| Use of alternative care                              | 27      | 2     | 3                             | 1.3            | 4          |                                                |
|                                                      | 3       | 1     |                               |                |            |                                                |
|                                                      | 27      | 1     |                               |                |            |                                                |

| FACILITATORS                                                     |         |       |                               |                |            |                                                |
|------------------------------------------------------------------|---------|-------|-------------------------------|----------------|------------|------------------------------------------------|
| Factor                                                           | Study # | Score | Number of studies with factor | Average scores | Final Rank | Comment if result not obvious or mixed methods |
| Provider factors                                                 |         |       |                               |                |            |                                                |
| Guideline availability, inclusion and awareness campaigns        | 16      | 1     | 2                             | 2.0            | 4          |                                                |
|                                                                  | 9       | 3     |                               |                |            |                                                |
| Infrastructure and equipment: technology improving communication | 28      | 2     | 1                             | 2              | 2          |                                                |
| Decentralization                                                 | 4       | 3     | 7                             | 2.9            | 20         | In the discussion                              |
|                                                                  | 10      | 3     |                               |                |            |                                                |
|                                                                  | 8       | 3     |                               |                |            |                                                |
|                                                                  | 19      | 3     |                               |                |            |                                                |
|                                                                  | 24      | 3     |                               |                |            |                                                |
|                                                                  | 25      | 3     |                               |                |            |                                                |
|                                                                  | 3       | 2     |                               |                |            | Listed in Table 1                              |
|                                                                  | 26      | 2     |                               |                |            | 1                                              |
| Level of care- lower level , TB clinic or in-patient care        | 5       | 3     | 4                             | 2.8            | 11         |                                                |
|                                                                  | 19      | 3     |                               |                |            |                                                |
|                                                                  | 22      | 2     |                               |                |            |                                                |
|                                                                  | 16      | 3     |                               |                |            |                                                |
| Public sector care                                               | 23      | 3     | 2                             | 3.0            | 6          |                                                |
|                                                                  | 3       | 3     |                               |                |            |                                                |
| Urban location: differences in testing, capacity and referral    | 5       | 2     | 4                             | 2.8            | 11         |                                                |
|                                                                  | 13      | 3     |                               |                |            |                                                |
|                                                                  | 14      | 3     |                               |                |            |                                                |
|                                                                  | 24      | 3     |                               |                |            |                                                |



| Factor                                                      | Study # | Score | Number of studies with factor | Average scores | Final Rank | Comment if result not obvious or mixed methods |
|-------------------------------------------------------------|---------|-------|-------------------------------|----------------|------------|------------------------------------------------|
| Provider factors                                            |         |       |                               |                |            |                                                |
| HCW knowledge, training and experience                      | 27      | 3     | 3                             | 2.7            | 8          |                                                |
|                                                             | 3       | 2     |                               |                |            | Listed in Table 1                              |
|                                                             | 26      | 3     |                               |                |            |                                                |
| HCW motivation and attitude                                 | 3       | 3     | 1                             | 3              | 3          |                                                |
| Newer diagnostics and timeliness to diagnosis and treatment | 10      | 3     | 7                             | 3.0            | 21         |                                                |
|                                                             | 4       | 3     |                               |                |            |                                                |
|                                                             | 5       | 3     |                               |                |            |                                                |
|                                                             | 9       | 3     |                               |                |            |                                                |
|                                                             | 11      | 3     |                               |                |            |                                                |
|                                                             | 12      | 3     |                               |                |            |                                                |
|                                                             | 20      | 3     |                               |                |            |                                                |
| Newer diagnostics on rates of diagnosis or treatment        | 8       | 3     | 1                             | 3              | 3          |                                                |
| Increased access to testing                                 | 8       | 3     | 1                             | 3              | 3          |                                                |
| Patient factors                                             |         |       |                               |                |            |                                                |
| Older patient age*                                          | 15      | 3     | 2                             | 3.0            | 6          |                                                |
|                                                             | 23      | 3     |                               |                |            |                                                |
| HIV positive status*                                        | 10      | 3     | 3                             | 3.0            | 9          |                                                |
|                                                             | 23      | 3     |                               |                |            |                                                |
|                                                             | 3       | 3     |                               |                |            |                                                |
| More presenting symptoms**                                  | 15      | 3     | 3                             | 2.7            | 8          |                                                |
|                                                             | 23      | 3     |                               |                |            |                                                |
|                                                             | 3       | 2     |                               |                |            |                                                |
| Patient agency and knowledge                                | 3       | 3     | 1                             | 3              | 3          |                                                |
| Family support                                              | 3       | 2     | 1                             | 2              | 2          |                                                |
| City or semi-urban residence                                | 7       | 2     | 2                             | 2.5            | 5          |                                                |
|                                                             | 22      | 3     |                               |                |            |                                                |
